# Supplementary material
Source: PubMed Central journal article supplement (PMC6011754)
Supplement: NIHMS973510-supplement-PDF.pdf [file NIHMS973510-supplement-PDF.pdf]

# Glycosylated Porphyrins, Phthalocyanines, and Other Porphyrinoids for Diagnostics and Therapeutics

Sunaina Singh,<sup>\*,†,a</sup> Amit Aggarwal,<sup>\*,†,a</sup> N. V. S. Dinesh K. Bhupathiraju,<sup>\*,§</sup> Gianluca Arianna,<sup>§</sup> Kirran Tiwari,<sup>§</sup> Charles Michael Drain<sup>§,‡</sup>

<sup>†</sup>Department of Natural Sciences, LaGuardia Community College of the City University of New York, Long Island City, New York, United States, 11101

<sup>§</sup>Department of Chemistry and Biochemistry, Hunter College of the City University of New York, New York, United States, 10065

<sup>‡</sup>The Rockefeller University, New York, United States, 10065

Dedicated to the memory of Dr. Clifford E. Soll, all around excellent chemist and colleague.

## Contents

1. APPENDIX S1
2. REFERENCES S7

## 1. APPENDIX

Table1: Appendix

| No. | Macrocycle | Spacer                                                                              | Sugar                | Example ref.        |
|-----|------------|-------------------------------------------------------------------------------------|----------------------|---------------------|
| 1   | Porphyrin  | 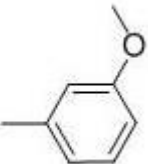 | Glucose<br>Galactose | Fig. 6 <sup>1</sup> |
| 2   | Porphyrin  |  | Galactose            | Fig 7 <sup>2</sup>  |

|    |                                                                         |                                                                                      |                                   |                                             |
|----|-------------------------------------------------------------------------|--------------------------------------------------------------------------------------|-----------------------------------|---------------------------------------------|
| 3  | Porphyrin,<br>Chlorin,<br>Isobacteriochlorin,<br>and<br>Bacteriochlorin | 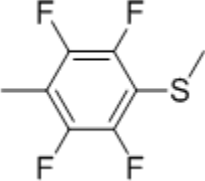    | Glucose &<br>Galactose            | Fig 26 <sup>3</sup><br>Fig 8,9 <sup>4</sup> |
| 4  | Porphyrin                                                               |     | Glucose                           | Fig. 10 <sup>5-7</sup>                      |
| 5  | Porphyrin                                                               |     | Glucose                           | Fig. 11 <sup>8</sup>                        |
| 6  | Porphyrin                                                               |     | Glucose                           | Fig. 12 <sup>9, 10</sup>                    |
| 7  | Zn-Porphyrin                                                            |     | Galactose                         | Fig 13 <sup>11</sup>                        |
| 8  | Porphyrin                                                               |    | Glucose<br>Galactose &<br>Mannose | Fig 14 <sup>12</sup>                        |
| 9  | Porphyrin                                                               |   | Glucose<br>Galactose &<br>Mannose | Fig 15 <sup>13</sup>                        |
| 10 | Porphyrin                                                               |  | Glucose                           | Fig 16 <sup>14, 15</sup>                    |

|    |              |                                                                                                                                  |                   |                      |
|----|--------------|----------------------------------------------------------------------------------------------------------------------------------|-------------------|----------------------|
| 11 | Cu-Porphyrin | 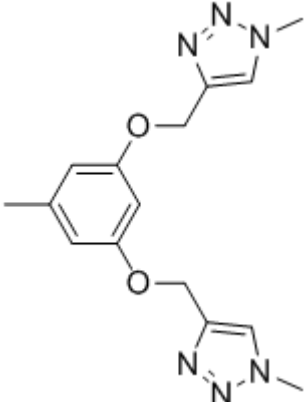                                                | Lactose           | Fig 17 <sup>6</sup>  |
| 12 | Zn-Porphyrin |                                                 | Glucose & Mannose | Fig 18 <sup>7</sup>  |
| 13 | Porphyrin    |                                                | Glucose           | Fig 19 <sup>8</sup>  |
| 14 | Porphyrin    |  <p style="text-align: center;">n=1 or 2</p> | Mannose           | Fig 20 <sup>9</sup>  |
| 15 | Porphyrin    |                                               | Glucose           | Fig 21 <sup>20</sup> |

|    |                                    |                                                                                     |                                                        |                          |
|----|------------------------------------|-------------------------------------------------------------------------------------|--------------------------------------------------------|--------------------------|
| 16 | Porphyrin                          | 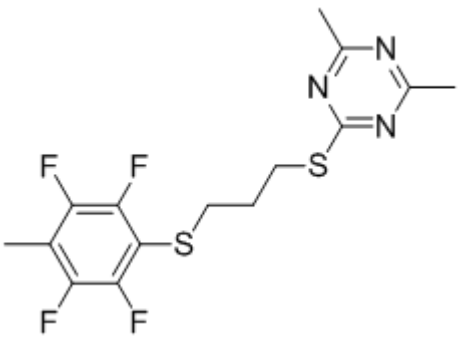  | Galactose                                              | Fig 22 <sup>21</sup>     |
| 17 | Porphyrin                          |    | Cyclodextrin                                           | Fig 23 <sup>22, 23</sup> |
| 18 | Porphyrin                          |    | Hyaluronic acid                                        | Fig 24 <sup>24</sup>     |
| 19 | Porphyrin                          |    | Ribose<br>Galactose<br>Glucose &<br>Fructose           | Fig 25 <sup>25</sup>     |
| 20 | Zn/H <sub>2</sub><br>Porpholactone |  | Glucose                                                | Fig 29 <sup>26</sup>     |
| 21 | Chlorin and<br>Bacteriochlorin     |  | Glucose                                                | Fig. 30 <sup>27</sup>    |
| 22 | trans-Chlorin                      |  | Glucose,<br>Fructose,<br>Galactose and<br>xylofuranose | Fig. 31 <sup>28</sup>    |
| 23 | Chlorin                            |  | Glucose                                                | Fig 32 <sup>29</sup>     |
| 24 | Chlorin                            |  | $\beta$ -Lactose                                       | Fig.33 <sup>30</sup>     |

|    |                                 |                                                                                      |                                  |                       |
|----|---------------------------------|--------------------------------------------------------------------------------------|----------------------------------|-----------------------|
| 25 | Corrole                         | 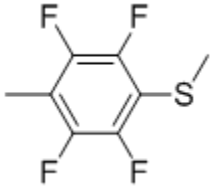    | Glucose & Xylose                 | Fig 34 <sup>31</sup>  |
| 26 | Corrole                         |     | Galactose                        | Fig 34 <sup>32</sup>  |
| 27 | Porphyrin Dimer                 |     | Glucose & Mannose<br><br>Lactose | Fig 35 <sup>33</sup>  |
| 28 | Zn-Porphyrin Oligomer           |     | Mannose                          | Fig 36 <sup>34</sup>  |
| 29 | Tripily bridged fused porphyrin |   | Glucose                          | Fig 37 <sup>35</sup>  |
| 30 | Zn-Porphyrin                    |   | Mannose                          | Fig 38 <sup>36</sup>  |
| 31 | Tetrabenzoporphyrin             |  | Glucose                          | Fig. 40 <sup>37</sup> |
| 32 | Pd(II) tetrabenzoporphyrin      |   | Galactose                        | Fig. 41 <sup>11</sup> |



|    |              |                                                                                   |                     |                          |
|----|--------------|-----------------------------------------------------------------------------------|---------------------|--------------------------|
| 46 | Porphyrazine |  | Galactose<br>Ribose | Fig 58 <sup>56, 57</sup> |
|----|--------------|-----------------------------------------------------------------------------------|---------------------|--------------------------|

## 2. REFERENCES

- Aicher, D.; Wiehe, A.; Stark, C. B. W. Synthesis of Glycoporphyrins Using Trichloroacetimidates as Glycosyl Donors. *Synlett* **2010**, 2010, 395-398.
- Tomé, J. P. C.; Silva, E. M. P.; Pereira, A. M. V. M.; Alonso, C. M. A.; Faustino, M. A. F.; Neves, M. G. P. M. S.; Tomé, A. C.; Cavaleiro, J. A. S.; Tavares, S. A. P.; Duarte, R. R.; Caeiro, M. F.; Valdeira, M. L. Synthesis of neutral and cationic tripyridylporphyrin-d-galactose conjugates and the photoinactivation of HSV-1. *Bioorg. Med. Chem.* **2007**, *15*, 4705-4713.
- Singh, S.; Aggarwal, A.; Thompson, S.; Tomé, J. P. C.; Zhu, X.; Samaroo, D.; Vinodu, M.; Gao, R.; Drain, C. M. Synthesis and Photophysical Properties of Thioglycosylated Chlorins, Isobacteriochlorins, and Bacteriochlorins for Bioimaging and Diagnostics. *Bioconjugate Chem.* **2010**, *21*, 2136-2146.
- Bhupathiraju, N. V. S. D. K.; Hu, X.; Zhou, Z.; Fronczek, F. R.; Couraud, P. O.; Romero, I. A.; Weksler, B.; Vicente, M. G. H. Synthesis and in vitro evaluation of BBB permeability, tumor cell uptake, and cytotoxicity of a series of carboranylporphyrin conjugates. *J. Med. Chem.* **2014**, *57*, 6718-28.
- Ahmed, S.; Davoust, E.; Savoie, H.; Boa, A. N.; Boyle, R. W. Thioglycosylated cationic porphyrins--convenient synthesis and photodynamic activity in vitro. *Tetrahedron Lett.* **2004**, *45*, 6045-6047.
- Chen, X.; Hui, L.; Foster, D. A.; Drain, C. M. Efficient Synthesis and Photodynamic Activity of Porphyrin-Saccharide Conjugates: Targeting and Incapacitating Cancer Cells. *Biochemistry* **2004**, *43*, 10918-10929.
- Pasetto, P.; Chen, X.; Drain, C. M.; Franck, R. W. Synthesis of hydrolytically stable porphyrin C- and S-glycoconjugates in high yields. *Chem. Commun.* **2001**, 81-82.
- Di Stasio, B.; Frochot, C.; Dumas, D.; Even, P.; Zwier, J.; Müller, A.; Didelon, J.; Guillemain, F.; Viriot, M.-L.; Barberi-Heyob, M. The 2-aminoglucosamide motif improves cellular uptake and photodynamic activity of tetraphenylporphyrin. *Eur. J. Med. Chem.* **2005**, *40*, 1111-1122.
- Monti, D.; Venanzi, M.; Gatto, E.; Mancini, G.; Sorrenti, A.; Stepanek, P.; Drasar, P. Study of the supramolecular chiral assembly of meso-"C-glycoside"-porphyrin derivatives in aqueous media. *New J. Chem.* **2008**, *32*, 2127-2133.
- Stepanek, P.; Dukh, M.; Saman, D.; Moravcova, J.; Kniezo, L.; Monti, D.; Venanzi, M.; Mancini, G.; Drasar, P. Synthesis and solvent driven self-aggregation studies of meso-"C-glycoside"-porphyrin derivatives. *Org. Biomol. Chem.* **2007**, *5*, 960-970.
- Hao, E.; Jensen, T. J.; Vicente, M. G. H. Synthesis of porphyrin-carbohydrate conjugates using "click" chemistry and their preliminary evaluation in human HEp2 cells. *J. Porphyrins Phthalocyanines* **2009**, *13*, 51-59.
- Laville, I.; Pigaglio, S.; Blais, J.-C.; Doz, F.; Looock, B.; Maillard, P.; Grierson, D. S.; Blais, J. Photodynamic Efficiency of Diethylene Glycol-Linked Glycoconjugated Porphyrins in Human Retinoblastoma Cells. *J. Med. Chem.* **2006**, *49*, 2558-2567.
- Sylvain, I.; Zerrouki, R.; Granet, R.; Huang, Y. M.; Lagorce, J. F.; Guilloton, M.; Blais, J.-C.; Krausz, P. Synthesis and biological evaluation of thioglycosylated porphyrins for an application in photodynamic therapy. *Bioorg. Med. Chem.* **2002**, *10*, 57-69.
- Sol, V.; Charmot, A.; Krausz, P.; Trombotto, S.; Queneau, Y. Synthesis of New Glucosylated Porphyrins Bearing an  $\alpha$ -d-Linkage. *J. Carbohydr. Chem.* **2006**, *25*, 345-360.
- Sol, V.; Blais, J. C.; Carré, V.; Granet, R.; Guilloton, M.; Spiro, M.; Krausz, P. Synthesis, Spectroscopy, and Photocytotoxicity of Glycosylated Amino Acid Porphyrin Derivatives as Promising Molecules for Cancer Phototherapy. *J. Org. Chem.* **1999**, *64*, 4431-4444.
- Okada, M.; Kishibe, Y.; Ide, K.; Takahashi, T.; Hasegawa, T. Convenient Approach to Access Octa-Glycosylated Porphyrins via Click Chemistry. *Int. J. Carbohydr. Chem.* **2009**, 2009, Article ID 305276 (1-9).
- Locos, O. B.; Heindl, C. C.; Corral, A.; Senge, M. O.; Scanlan, E. M. Efficient Synthesis of Glycoporphyrins by Microwave-Mediated "Click" Reactions. *Eur. J. Org. Chem.* **2010**, 2010, 1026-1028.
- Ballardini, R.; Colonna, B.; Gandolfi, M. T.; Kalovidouris, S. A.; Orzel, L.; Raymo, F. M.; Stoddart, J. F. Porphyrin-Containing Glycodendrimers. *Eur. J. Org. Chem.* **2003**, 2003, 288-294.

19. Ballut, S.; Makky, A.; Loock, B.; Michel, J.-P.; Maillard, P.; Rosilio, V. New strategy for targeting of photosensitizers. Synthesis of glycodendrimeric phenylporphyrins, incorporation into a liposome membrane and interaction with a specific lectin. *Chem. Commun.* **2009**, 224-226.
20. Kushwaha, D.; Tiwari, V. K. Click Chemistry Inspired Synthesis of Glycoporphyrin Dendrimers. *J. Org. Chem.* **2013**, *78*, 8184-8190.
21. Silva, S.; Pereira, P. M. R.; Silva, P.; Almeida Paz, F. A.; Faustino, M. A. F.; Cavaleiro, J. A. S.; Tome, J. P. C. Porphyrin and phthalocyanine glycodendritic conjugates: synthesis, photophysical and photochemical properties. *Chem. Commun.* **2012**, *48*, 3608-3610.
22. Kralova, J.; Synytsya, A.; Pouckova, P.; Koc, M.; Dvorak, M.; Kral, V. Novel Porphyrin Conjugates with a Potent Photodynamic Antitumor Effect: Differential Efficacy of Mono- and Bis- $\beta$ -cyclodextrin Derivatives In Vitro and In Vivo. *Photochem. Photobiol.* **2006**, *82*, 432-438.
23. Kralova, J.; Kejik, Z.; Briza, T.; Pouckova, P.; Kral, A.; Martasek, P.; Kral, V. Porphyrin-cyclodextrin conjugates as a nanosystem for versatile drug delivery and multimodal cancer therapy. *J. Med. Chem.* **2010**, *53*, 128-38.
24. Li, F.; Bae, B.-C.; Na, K. Acetylated hyaluronic acid/photosensitizer conjugate for the preparation of nanogels with controllable phototoxicity: synthesis, characterization, autophotoquenching properties, and in vitro phototoxicity against HeLa cells. *Bioconjugate Chem.* **2010**, *21*, 1312-1320.
25. de C da Silva, F.; Ferreira, V. F.; de Souza, M. C. B. V.; Tomé, A. C.; Neves, M. G. P. M. S.; Silva, A. M. S.; Cavaleiro, J. A. S. Synthesis of Glycoporphyrins by Cross-Metathesis Reactions. *Synlett* **2008**, 2008, 1205-1207.
26. Tang, J.; Chen, J.-J.; Jing, J.; Chen, J.-Z.; Lv, H.; Yu, Y.; Xu, P.; Zhang, J.-L. beta-Lactonization of fluorinated porphyrin enhances LDL binding affinity, cellular uptake with selective intracellular localization. *Chem. Sci.* **2014**, *5*, 558-566.
27. McCarthy, J. R.; Bhaumik, J.; Merbouh, N.; Weissleder, R. High-yielding syntheses of hydrophilic conjugatable chlorins and bacteriochlorins. *Org. Biomol. Chem.* **2009**, *7*, 3430-3436.
28. Gomes, A. T. P. C.; Leao, R. A. C.; da Silva, F. C.; Neves, M. G. P. M. S.; Faustino, M. A. F.; Tomé, A. C.; Silva, A. M. S.; Pinheiro, S.; de Souza, M. C. B. V.; Ferreira, V. F.; Cavaleiro, J. A. S. Synthesis of new glycoporphyrin derivatives through carbohydrate-substituted  $\alpha$ -diazoacetates. *J. Porphyrins Phthalocyanines* **2009**, *13*, 247-255.
29. Zhang, M.; Zhang, Z.; Blessington, D.; Li, H.; Busch, T. M.; Madrak, V.; Miles, J.; Chance, B.; Glickson, J. D.; Zheng, G. Pyropheophorbide 2-Deoxyglucosamide: A New Photosensitizer Targeting Glucose Transporters. *Bioconjugate Chem.* **2003**, *14*, 709-714.
30. Grin, M. A.; Lonin, I. S.; Lakhina, A. A.; Ol'shanskaya, E. S.; Makarov, A. I.; Sebyakin, Y. L.; Guryeva, L. Y.; Toukach, P. V.; Kononikhin, A. S.; Kuzmin, V. A.; Mironov, A. F. 1,3-dipolar cycloaddition in the synthesis of glycoconjugates of natural chlorins and bacteriochlorins. *J. Porphyrins Phthalocyanines* **2009**, *13*, 336-345.
31. Samaroo, D.; Vinodu, M.; Chen, X.; Drain, C. M. meso-Tetra(pentafluorophenyl)porphyrin as an efficient platform for combinatorial synthesis and the selection of new photodynamic therapeutics using a cancer cell line. *J. Comb. Chem.* **2007**, *9*, 998-1011.
32. Cardote, T. A. F.; Barata, J. F. B.; Faustino, M. A. F.; Preuß, A.; Neves, M. G. P. M. S.; Cavaleiro, J. A. S.; Ramos, C. I. V.; Santana-Marques, M. G. O.; Röder, B. Pentafluorophenylcorrole-d-galactose conjugates. *Tetrahedron Lett.* **2012**, *53*, 6388-6393.
33. Garcia, G.; Hammerer, F.; Poyer, F.; Achelle, S.; Teulade-Fichou, M.-P.; Maillard, P. Carbohydrate-conjugated porphyrin dimers: Synthesis and photobiological evaluation for a potential application in one-photon and two-photon photodynamic therapy. *Bioorg. Med. Chem.* **2013**, *21*, 153-165.
34. Achelle, S.; Couleaud, P.; Baldeck, P.; Teulade-Fichou, M.-P.; Maillard, P. Carbohydrate-Porphyrin Conjugates with Two-Photon Absorption Properties as Potential Photosensitizing Agents for Photodynamic Therapy. *Eur. J. Org. Chem.* **2011**, 2011, 1271-1279.
35. Singh, S.; Aggarwal, A.; Bhupathiraju, N. V. S. D. K.; Newton, B.; Nafees, A.; Gao, R.; Drain, C. M. Synthesis and cell phototoxicity of a triply bridged fused diporphyrin appended with six thioglucose units. *Tetrahedron Lett.* **2014**, *55*, 6311-6314.
36. Hammerer, F.; Garcia, G.; Chen, S.; Poyer, F.; Achelle, S.; Fiorini-Debuisschert, C.; Teulade-Fichou, M.-P.; Maillard, P. Synthesis and Characterization of Glycoconjugated Porphyrin Triphenylamine Hybrids for Targeted Two-Photon Photodynamic Therapy. *J. Org. Chem.* **2014**, *79*, 1406-1417.
37. Ménard, F.; Sol, V.; Ringot, C.; Granet, R.; Alves, S.; Morvan, C. L.; Queneau, Y.; Ono, N.; Krausz, P. Synthesis of tetraglucosyl- and tetrapolyamine-tetrabenzoporphyrin conjugates for an application in PDT. *Bioorg. Med. Chem.* **2009**, *17*, 7647-7657.
38. Lee, P. P. S.; Lo, P.-C.; Chan, E. Y. M.; Fong, W.-P.; Ko, W.-H.; Ng, D. K. P. Synthesis and in vitro photodynamic activity of novel galactose-containing phthalocyanines. *Tetrahedron Lett.* **2005**, *46*, 1551-1554.



39. Lo, P.-C.; Chan, C. M. H.; Liu, J.-Y.; Fong, W.-P.; Ng, D. K. P. Highly Photocytotoxic Glucosylated Silicon(IV) Phthalocyanines. Effects of Peripheral Chloro Substitution on the Photophysical and Photodynamic Properties. *J. Med. Chem.* **2007**, *50*, 2100-2107.
40. Iqbal, Z.; Lyubimtsev, A.; Hanack, M.; Ziegler, T. Synthesis and characterization of 1,8(11),15(18),22(25)-tetraglycosylated zinc(II) phthalocyanines. *J. Porphyrins Phthalocyanines* **2010**, *14*, 494-498.
41. Zhang, P.; Zhang, S.; Han, G. Synthesis of Novel Asymmetric Zinc (II) Phthalocyanines Bearing Octadecyloxy and Glucosyl Groups. *Molecules* **2009**, *14*, 3688-3693.
42. Kimani, S. G.; Shmigol, T. A.; Hammond, S.; Phillips, J. B.; Bruce, J. I.; MacRobert, A. J.; Malakhov, M. V.; Golding, J. P. Fully Protected Glycosylated Zinc (II) Phthalocyanine Shows High Uptake and Photodynamic Cytotoxicity in MCF-7 Cancer Cells. *Photochem. Photobiol.* **2013**, *89*, 139-149.
43. Ribeiro, A. O.; Tomé, J. P. C.; Neves, M. G. P. M. S.; Tomé, A. C.; Cavaleiro, J. A. S.; Iamamoto, Y.; Torres, T. [1,2,3,4-Tetrakis(alpha/beta-d-galactopyranos-6-yl)phthalocyaninato]zinc(II): a water-soluble phthalocyanine. *Tetrahedron Lett.* **2006**, *47*, 9177-9180.
44. Iqbal, Z.; Hanack, M.; Ziegler, T. Synthesis of an octasubstituted galactose zinc(II) phthalocyanine. *Tetrahedron Lett.* **2009**, *50*, 873-875.
45. Aggarwal, A.; Singh, S.; Zhang, Y.; Anthes, M.; Samaroo, D.; Gao, R.; Drain, C. M. Synthesis and photophysics of an octathioglycosylated zinc(II) phthalocyanine. *Tetrahedron Lett.* **2011**, *52*, 5456-5459.
46. Lafont, D.; Zorlu, Y.; Savoie, H.; Albrieux, F.; Ahsen, V.; Boyle, R. W.; Dumoulin, F. Monoglycoconjugated phthalocyanines: Effect of sugar and linkage on photodynamic activity. *Photodiagn. Photodyn. Ther.* **2013**, *10*, 252-259.
47. Ermeydan, M. A.; Dumoulin, F.; Basova, T. V.; Bouchu, D.; Gurek, A. G.; Ahsen, V.; Lafont, D. Amphiphilic carbohydrate-phthalocyanine conjugates obtained by glycosylation or by azide-alkyne click reaction. *New J. Chem.* **2010**, *34*, 1153-1162.
48. Liu, J.-Y.; Lo, P.-C.; Fong, W.-P.; Ng, D. K. P. Effects of the number and position of the substituents on the in vitro photodynamic activities of glucosylated zinc(ii) phthalocyanines. *Org. Biomol. Chem.* **2009**, *7*, 1583-1591.
49. Soares, A. R. M.; Tomé, J. P. C.; Neves, M. G. P. M. S.; Tomé, A. C.; Cavaleiro, J. A. S.; Torres, T. Synthesis of water-soluble phthalocyanines bearing four or eight d-galactose units. *Carbohydr. Res.* **2009**, *344*, 507-510.
50. Berthold, H. J.; Franke, S.; Thiem, J.; Schotten, T. Ex Post Glycoconjugation of Phthalocyanines. *J. Org. Chem.* **2010**, *75*, 3859-3862.
51. Zorlu, Y. D., F.; Bouchu, D.; Ahsen, V.; Lafont, D. Monoglycoconjugated water-soluble phthalocyanines. Design and synthesis of potential selectively targeting PDT photosensitisers. *Tetrahedron Lett.* **2010**, *51*, 6615-6618.
52. Kanat, Z.; Dincer, H. The synthesis and characterization of nonperipherally tetra terminal alkynyl substituted phthalocyanines and glycoconjugation via the click reaction. *Dalton Trans.* **2014**, *43*, 8654-8663.
53. de la Escosura, A.; Martínez-Díaz, M. V.; Thordarson, P.; Rowan, A. E.; Nolte, R. J. M.; Torres, T. Donor-Acceptor Phthalocyanine Nanoaggregates. *J. Am. Chem. Soc.* **2003**, *125*, 12300-12308.
54. Guldi, D. M.; Gouloumis, A.; Vázquez, P.; Torres, T.; Georgakilas, V.; Prato, M. Nanoscale Organization of a Phthalocyanine-Fullerene System: Remarkable Stabilization of Charges in Photoactive 1-D Nanotubules. *J. Am. Chem. Soc.* **2005**, *127*, 5811-5813.
55. Lau, J. T. F.; Lo, P.-C.; Tsang, Y.-M.; Fong, W.-P.; Ng, D. K. P. Unsymmetrical [small beta]-cyclodextrin-conjugated silicon(iv) phthalocyanines as highly potent photosensitisers for photodynamic therapy. *Chem. Commun.* **2011**, *47*, 9657-9659.
56. Horne, T. K.; Cronjé, M. J. Novel Porphyrazine Derivatives show Promise for Photodynamic Therapy despite Restrictions in Hydrophilicity. *Photochem. Photobiol.* **2014**, *90*, 648-658.
57. Williams, D. B. G. M., G. B. The synthesis and characterisation of carbohydrate-functionalised porphyrazines. *Dyes Pigm.* **2011**, *88*, 65-74.
